# Supplementary material
Source: MDPI journal article supplement (https://www.mdpi.com/1424-8247/16/8/1158)
Supplement: s1 [file s1]

## Supporting information

# Unraveling the In Vitro Toxicity Profile of Psychedelic 2C Phenethylamines and Their *N*-Benzylphenethylamine (NBOMe) Analogues

Daniel Martins <sup>1,†</sup>, Eva Gil-Martins <sup>1,2,3,†</sup>, Fernando Cagide <sup>1</sup>, Catarina da Fonseca <sup>2,3</sup>, Sofia Benfeito <sup>1</sup>,

Carlos Fernandes <sup>1</sup>, Daniel Chavarria <sup>1</sup>, Fernando Remião <sup>2,3</sup>, Renata Silva <sup>2,3,\*</sup> and Fernanda Borges <sup>1,\*</sup>

<sup>1</sup> CIQUP-IMS/Department of Chemistry and Biochemistry, Faculty of Sciences, University of Porto, Rua do Campo Alegre s/n, 4169-007 Porto, Portugal; ester.benfeito@fc.up.pt (S.B.); carlos.fernandes@fc.up.pt (C.F.); daniel.chavarria@fc.up.pt (D.C.)

<sup>2</sup> Associate Laboratory i4HB—Institute for Health and Bioeconomy, Faculty of Pharmacy, University of Porto, 4050-313 Porto, Portugal; up201804901@edu.ff.up.pt (C.d.F.); remiao@ff.up.pt (F.R.)

<sup>3</sup> UCIBIO—Applied Molecular Biosciences Unit, Laboratory of Toxicology, Department of Biological Sciences, Faculty of Pharmacy, University of Porto, 4050-313 Porto, Portugal

\* Correspondence: rsilva@ff.up.pt (R.S.); fborges@fc.up.pt (F.B.)

† These authors contributed equally to this work.

## Figures

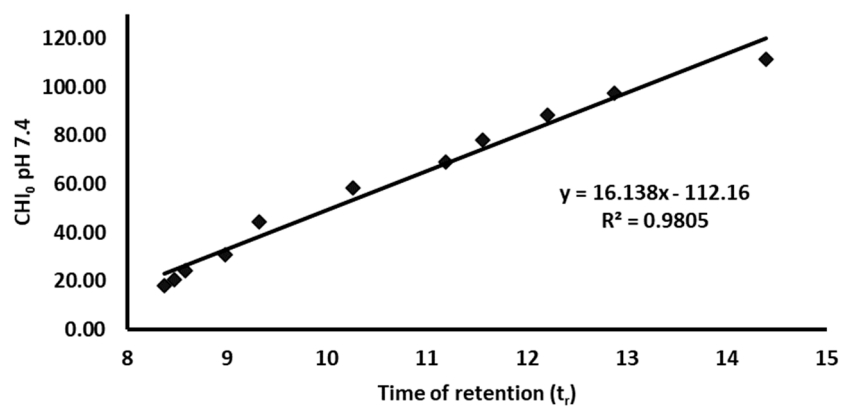

**Figure S1.** Calibration line obtained after plotting the individual retention times of the standard compounds as a function of their respective literature CHI values at pH 7.4.

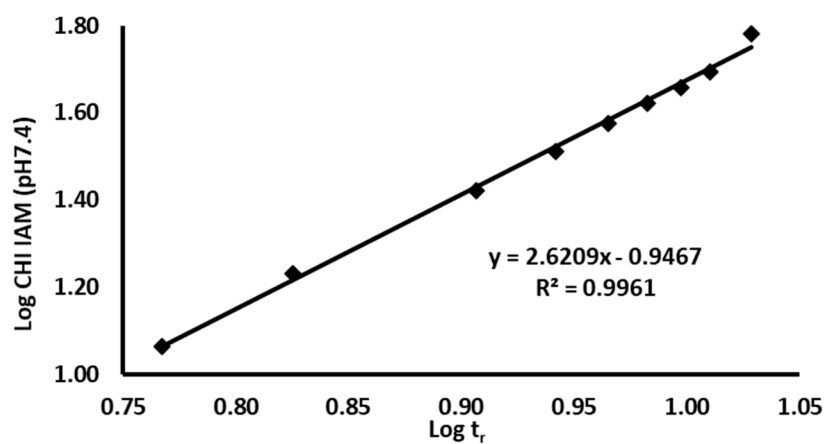

**Figure S2.** Calibration line obtained after plotting the logarithmic values of the individual retention times of the standard compounds as a function of the logarithmic values of their respective CHI (IAM) values at pH 7.4.

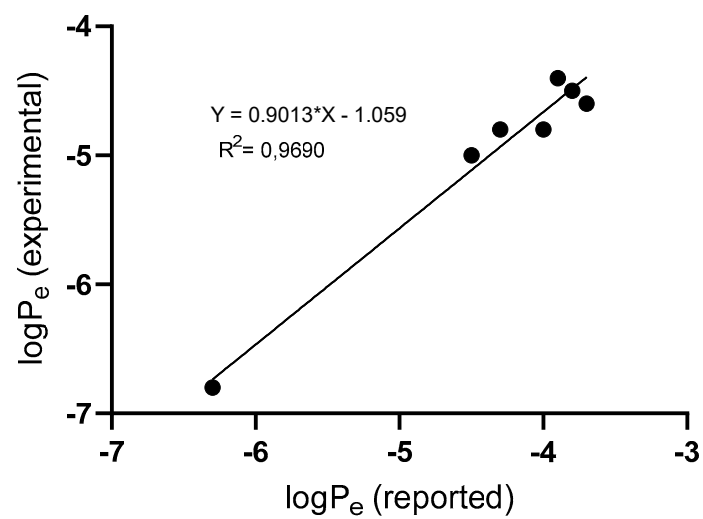

**Figure S3.** Calibration line obtained after plotting the controls experimental and reported PAMPA-BBB permeability (see data on the Table 2 of the manuscript).

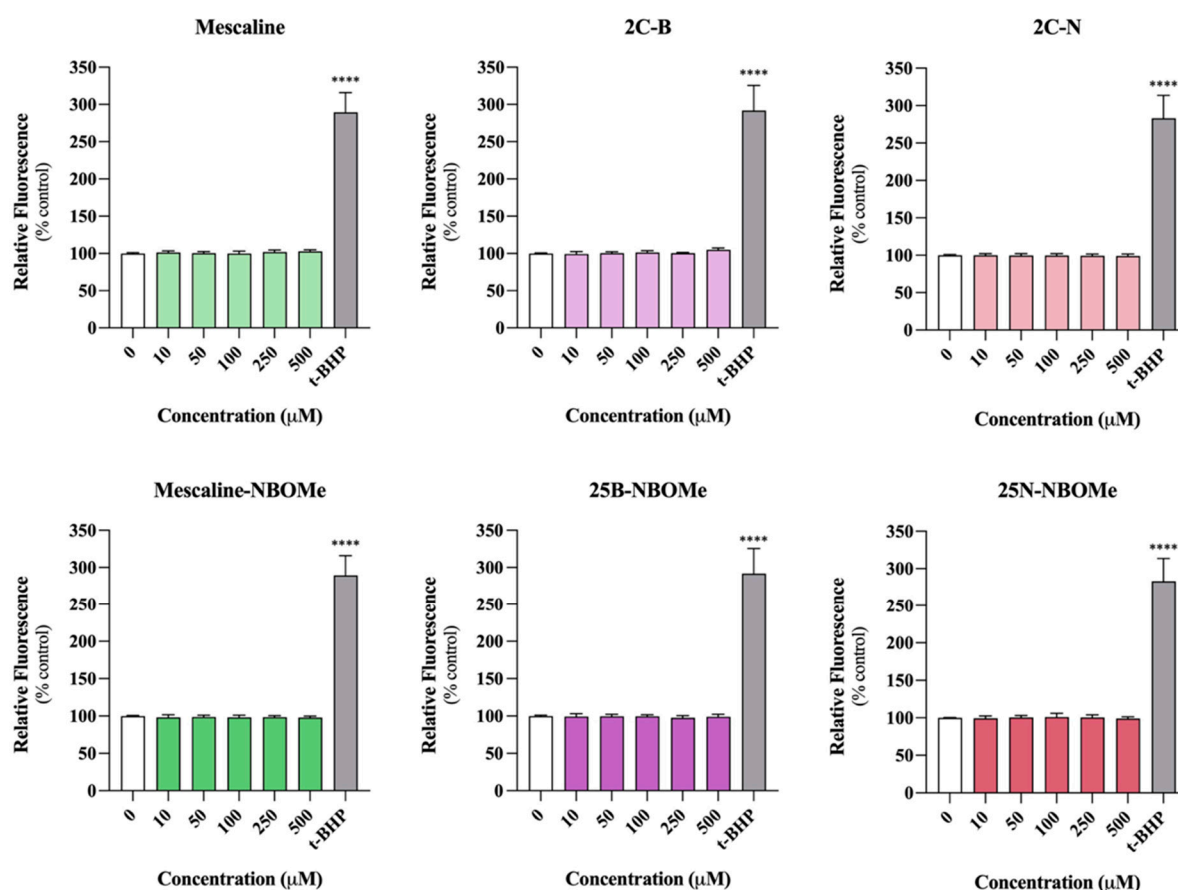

**Figure S4.** Intracellular reactive oxygen species (ROS) levels evaluated with DCFH-DA probe (10  $\mu\text{M}$ ), in differentiated SH-SY5Y cells, 24 hours after exposure to the tested drugs. Results are presented as Mean  $\pm$  SD of at least 4 independent experiments (performed in triplicate). Tert-butyl hydroperoxide (t-BHP, 200  $\mu\text{M}$ ) was used as a positive control. Statistical comparisons were performed using One-way ANOVA, followed by Dunnett's multiple comparison post hoc test. [\*\*\*\* p < 0.0001 vs. control (0  $\mu\text{M}$ )]. In all cases, p values < 0.05 were considered statistically significant.

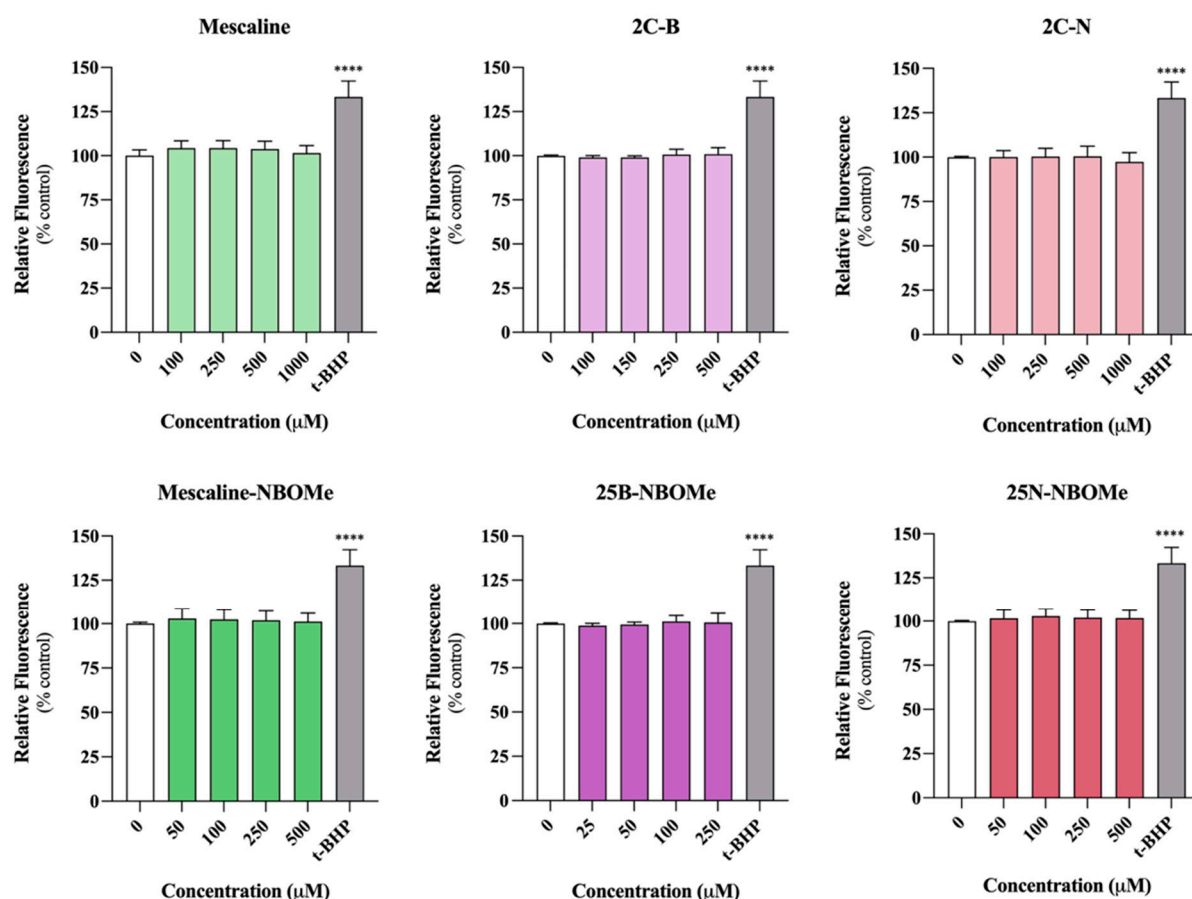

**Figure S5.** Intracellular reactive oxygen species (ROS) evaluated with DCFH-DA probe (10 μM), 24 hours after exposure of HepG2 cells to the tested drugs. Results are presented as Mean ± SD of at least 4 independent experiments (performed in triplicate). Tert-butyl hydroperoxide (t-BHP, 200 μM) was used as a positive control. Statistical comparisons were performed using One-way ANOVA, followed by Dunnett's multiple comparison post hoc test [\*\*\*\*  $p < 0.0001$  vs. control (0 μM)]. In all cases,  $p$  values  $< 0.05$  were considered statistically significant.

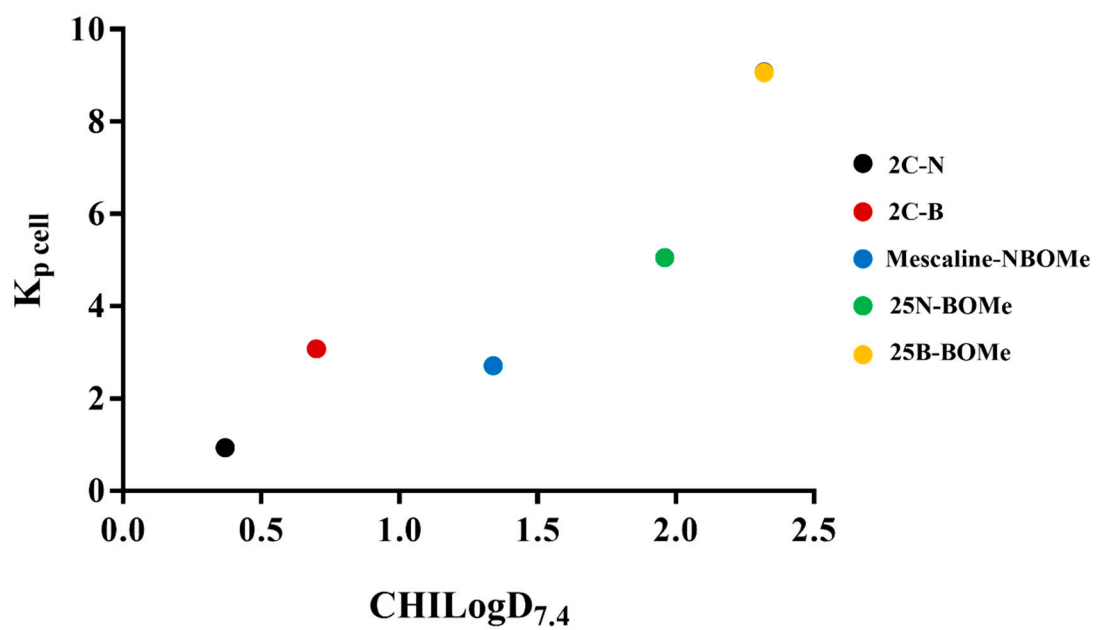

**Figure S6.** Correlation between the values of  $K_{p\text{ cell}}$  and  $\text{CHILogD}_{7.4}$  values.

## Tables

**Table S1.** Individual literature CHI values of the of standards at pH 7.4 and their retention times ( $t_r$ ) obtained by HPLC.

| <b>pH 7.4</b>             |                        |                         |
|---------------------------|------------------------|-------------------------|
| <b>Reference compound</b> | <b>CHI<sub>0</sub></b> | <b><math>t_r</math></b> |
| <b>Theophylline</b>       | 18.19                  | 8.38                    |
| <b>Paracetamol</b>        | 20.59                  | 8.47                    |
| <b>Caffeine</b>           | 24.12                  | 8.58                    |
| <b>Benzimidazole</b>      | 30.71                  | 8.98                    |
| <b>Colchicine</b>         | 44.32                  | 9.32                    |
| <b>Carbamazepine</b>      | 58.45                  | 10.26                   |
| <b>Indole</b>             | 69.15                  | 11.19                   |
| <b>Propiophenone</b>      | 78.41                  | 11.56                   |
| <b>Butyrophenone</b>      | 88.49                  | 12.21                   |
| <b>Valerophenone</b>      | 97.67                  | 12.88                   |
| <b>Heptanophenone</b>     | 111.8                  | 14.40                   |

**Table S2.** Individual literature CHI (IAM) values of the standards at pH 7.4, their retention times ( $t_{\text{IAM}}$ ) experimentally determined by HPLC and their respective logarithmic values.

|                       | pH 7.4      |               |           |                 |
|-----------------------|-------------|---------------|-----------|-----------------|
|                       | $t_r$ (min) | Log ( $t_r$ ) | CHI (IAM) | Log [CHI (IAM)] |
| <b>Acetanilide</b>    | 5.85        | 0.77          | 11.57     | 1.06            |
| <b>Acetophenone</b>   | 6.69        | 0.83          | 17.07     | 1.23            |
| <b>Propiophenone</b>  | 8.07        | 0.91          | 26.39     | 1.42            |
| <b>Butyrophenone</b>  | 8.746       | 0.94          | 32.55     | 1.51            |
| <b>Valerophenone</b>  | 9.226       | 0.97          | 37.71     | 1.58            |
| <b>Hexanophenone</b>  | 9.611       | 0.98          | 41.91     | 1.62            |
| <b>Heptanophenone</b> | 9.939       | 1.00          | 45.49     | 1.66            |

**Table S3.** Evaluation of *h*MAO inhibitory activities of the drugs under study and reference MAO inhibitors.

| Compound               | % inhibition at 10 $\mu$ M<br>or IC <sub>50</sub> ( $\mu$ M) |                   | SI <sup>a</sup> |
|------------------------|--------------------------------------------------------------|-------------------|-----------------|
|                        | <i>h</i> MAO-A                                               | <i>h</i> MAO-B    |                 |
| <b>Mescaline</b>       | 2.5 %                                                        | 21.2 %            | —               |
| <b>Mescaline-NBOME</b> | 3.9 %                                                        | 89.0 %            | —               |
| <b>2CB</b>             | 17.5 %                                                       | 27.2 %            | —               |
| <b>25B-NBOME</b>       | 15.0 %                                                       | 33.9 %            | —               |
| <b>2C-N</b>            | 5.8 %                                                        | 18.0 %            | —               |
| <b>25N-NBOME</b>       | 8.9 %                                                        | 25.5 %            | —               |
| <b>Clorgyline</b>      | 0.00260 $\pm$ 0.00033                                        | 1.93 $\pm$ 0.16   | 0.00135         |
| <b>Rasagiline</b>      | 3.72 $\pm$ 0.38                                              | 0.149 $\pm$ 0.023 | 24.9            |

<sup>a</sup> SI: *h*MAO-B selectivity index = IC<sub>50</sub>(*h*MAO-A)/IC<sub>50</sub>(*h*MAO-B).
